# Supplementary material for: Tracking the genome-wide occupancy of Arabidopsis LEAFY COTYLEDON1 in endosperm development
Source: Springer Nature journal article supplement (doi:10.1038/s42003-025-08075-y), 2025-05-21
Supplement: MOESM1 [file 42003_2025_8075_MOESM1_ESM.pdf]

# **Tracking the genome-wide occupancy of Arabidopsis LEAFY COTYLEDON1 in endosperm development**

Jingpu Song, Xin Xie, Ioannis Mavraganis, Bianyun Yu, Wenyun Shen, Hui Yang, Daoquan Xiang, Yangdou Wei,  
Yuhai Cui & Jitao Zou

## Supplementary Figure 1

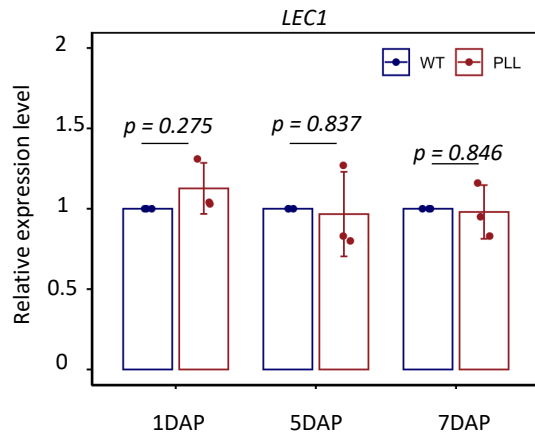

**Supplementary Figure 1. Restoration of *LEC1* expression in the PLL transgenic line.** Relative expression of *LEC1* in the WT and PLL seeds at 1, 5, and 7 DAPs. The *CACS* gene was used as an internal control. Values are mean  $\pm$  standard error of three biological replicates.  $p$  values were determined by conducting Student's t-test.

## Supplementary Figure 2

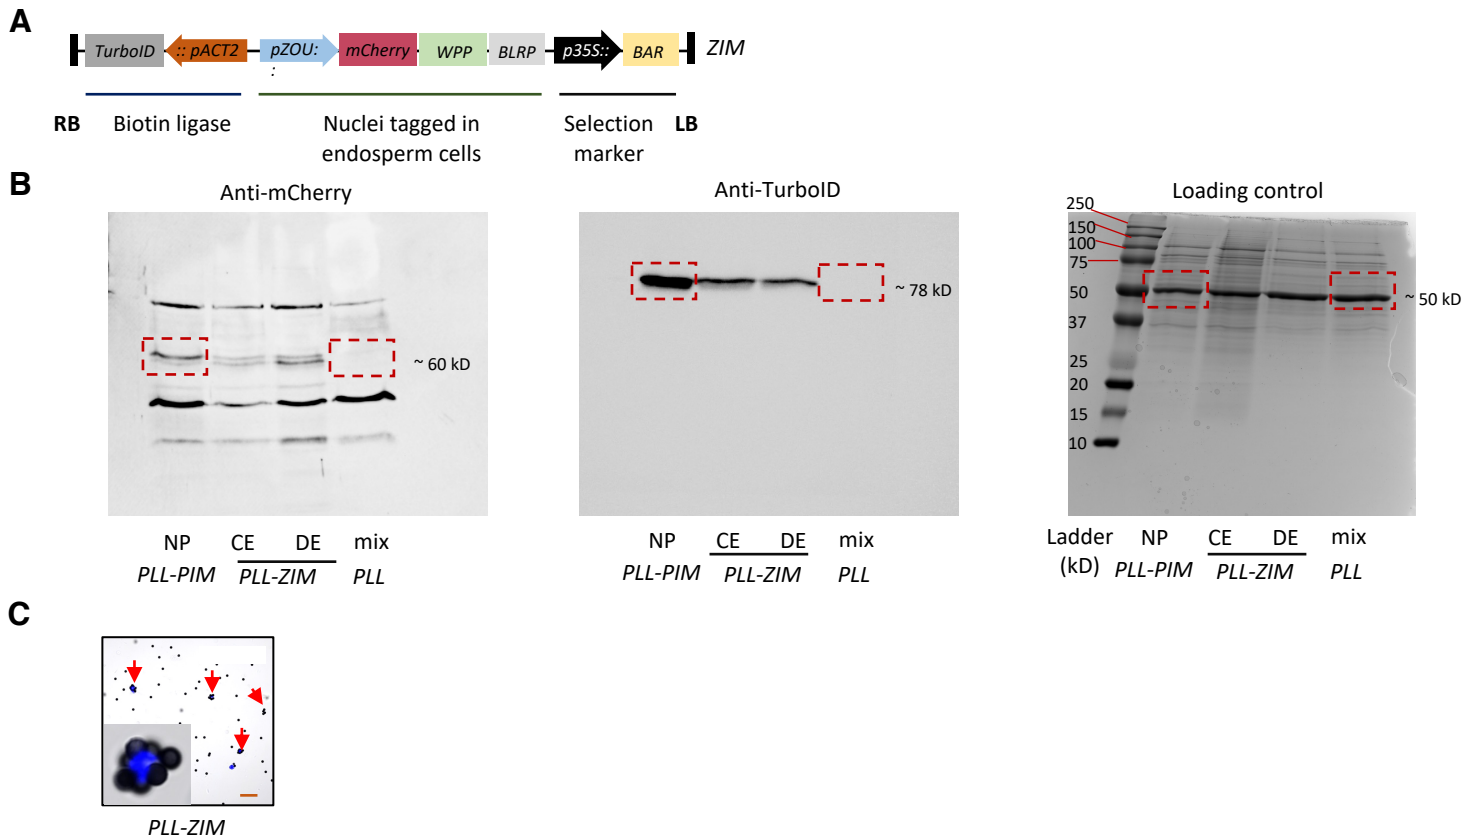

**Supplementary Figure 2. Modification of INTACT system for cellular endosperm nuclei isolation.** (A) Schematic diagrams showing the transgene structure of modified INTACT construct ZIM used for plant transformation. (B) Immunoblot (Uncropped gel images) showing the signals of mCherry (two bands, upper: biotinylated mCherry-WPP-BLRP lower band: non-biotinylated protein) and TurboID proteins in the developing seeds of the transgenic lines, PLL-PIM and PLL-ZIM. PLL seeds were used as negative control. Blot bands outlined in red boxes were shown in Fig. 1C. The images are representative of three independent replicates. NP, nuclei proliferation; CE, cellularization, DE, degeneration (C) Binding assay of beads-bound nuclei and free beads from PLL-ZIM developing seeds. Red arrows indicate beads-bound nuclei. Insets: magnified individual nuclei binding beads. Scale bar: 200  $\mu$ m.

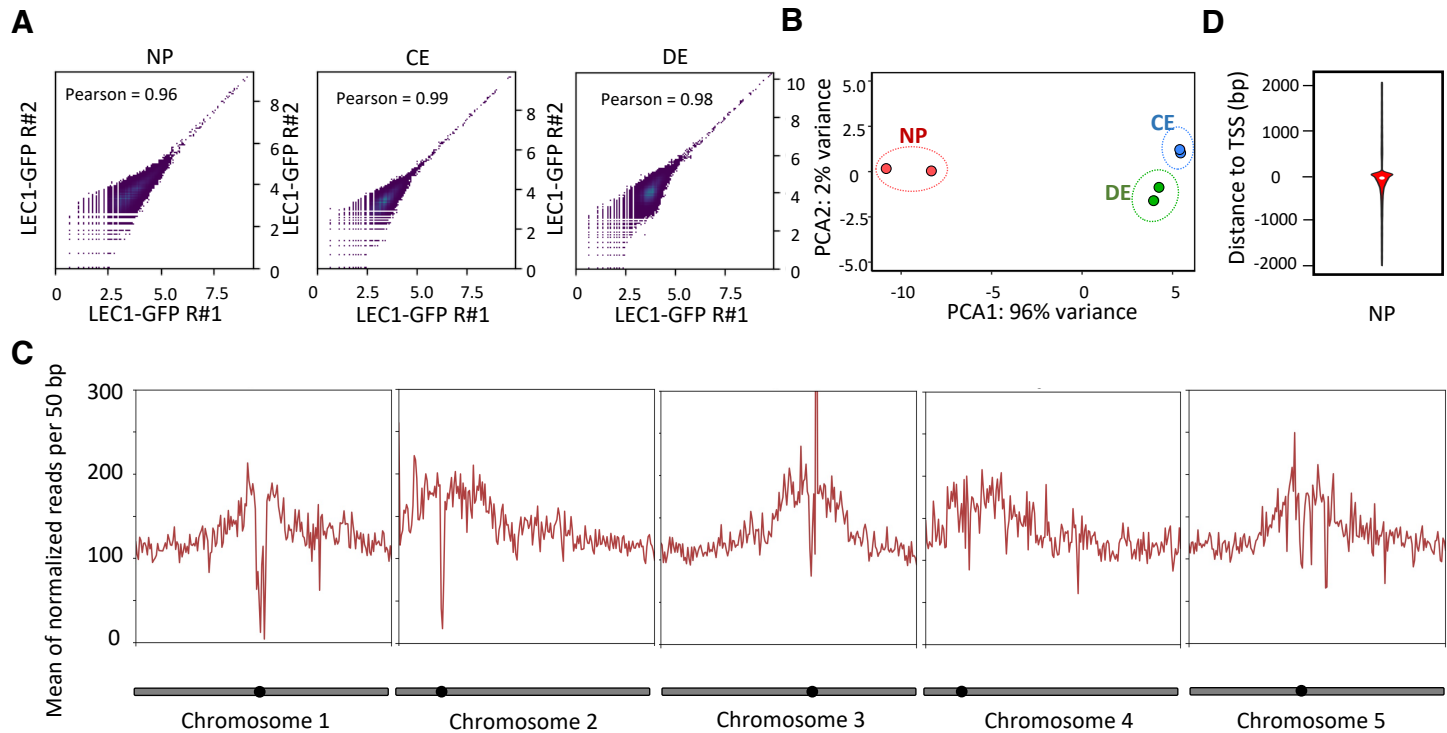

**Supplementary Figure 3. The correlation analysis of the biological replicates of LEC1-GFP ChIP-Seq datasets.** (A) Scatter plots showing high correlation between two biological replicates in ChIP-Seq at NP, CE, and DE, separately. (B) Principal component analysis (PCA) results indicates that the ChIP-Seq signal density profiles are separated by endosperm developmental stages. (C) Profile plots demonstrate that the distribution of LOGS in Arabidopsis chromosomes. Grey bars represent chromosome bodies and black dots indicate the centromeres. (D) Violine plots showing the distance of annotated ChIP-Seq peaks to the TSS at NP.

## Supplementary Figure 4

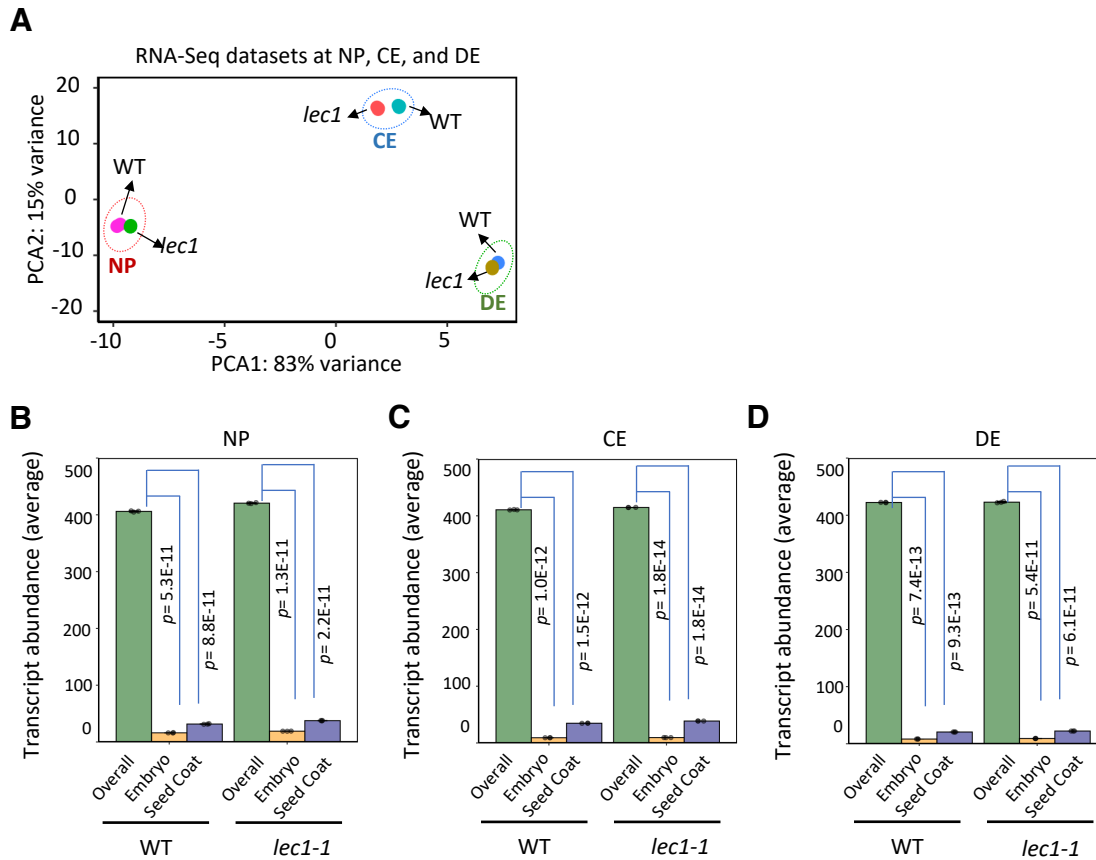

**Supplementary Figure 4. Quality analysis of RNA-seq datasets.** (A) Principal component analysis (PCA) results of RNA-Seq datasets indicates that the RNA-Seq signal density profiles are separated by endosperm developmental stages. (B-D) Average of gene transcripts of embryo- and seed coat-specific genes in the generated transcriptome profiles at NP, CE, and DE. The average transcript numbers of total genes (overall) at different genotypes and stages were included in the analysis. The list of embryo- and seed coat-specific genes were retrieved from previous published data (Pelletier, et al. 2017). Values are mean  $\pm$  standard error of three biological replicates.  $p$  values were determined with one-way ANOVA followed by the post-hoc Tukey multiple comparison tests.

Supplementary Figure 5

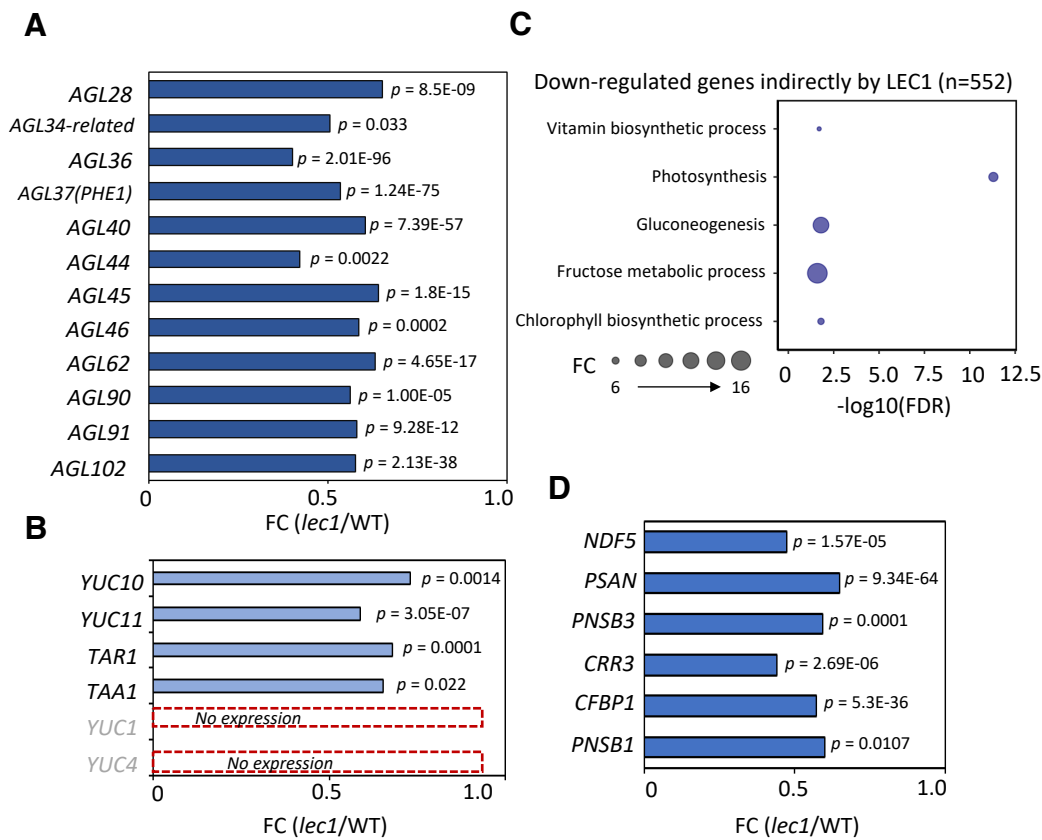

**Supplementary Figure 5. Gene expression analysis of LEC1 directly and indirectly down-regulated targets in endosperm at NP.** (A) Gene expression of LEC1-occupied down-regulated AGLs in the *lec1* endosperm at NP. (B) Gene expression levels of endosperm-specific genes involved in auxin biosynthesis. (C) GO analysis results elucidating the over-represented biological process (highlighted in navy blue colour) enriched among the non-LEC1-occupied down-regulated genes in *lec1* endosperm at NP. (D) Gene expression levels of down-regulated genes in photosynthesis.

Supplementary Figure 6

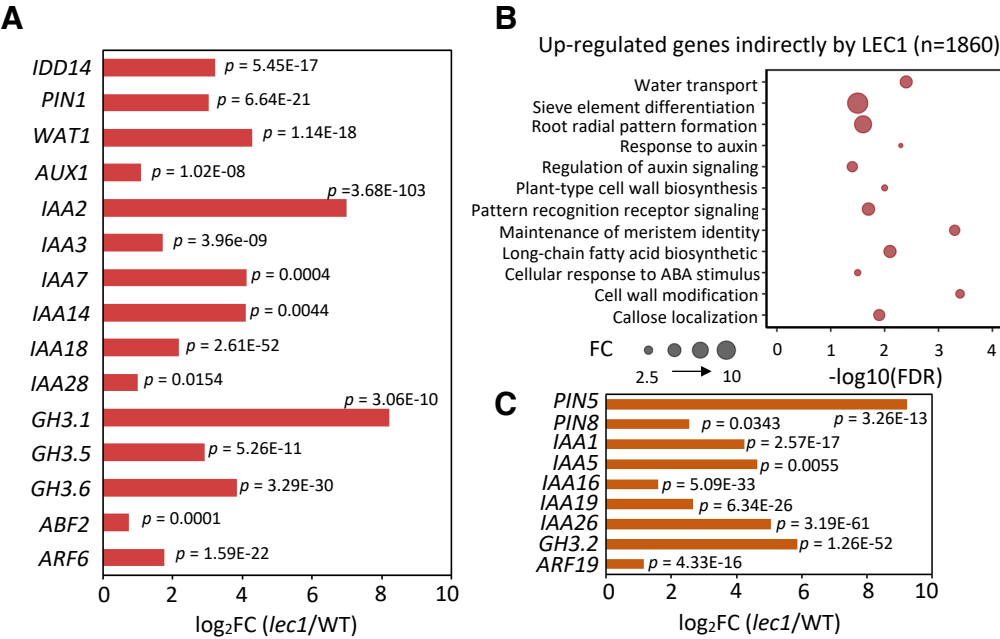

**Supplementary Figure 6. Gene expression analysis of LEC1 directly and indirectly up-regulated targets in endosperm at NP.** (A) Gene expression of LEC1-occupied up-regulated genes involved in auxin transportation and signaling in the *lec1* endosperm at NP. (B) GO analysis results elucidating the over-represented biological process (highlighted in red colour) enriched among the non-LEC1-occupied up-regulated genes in *lec1* endosperm at NP. (C) Gene expression of non-LEC1-occupied up-regulated genes involved in auxin response and signaling in the *lec1* endosperm at NP.

## Supplementary Figure 7

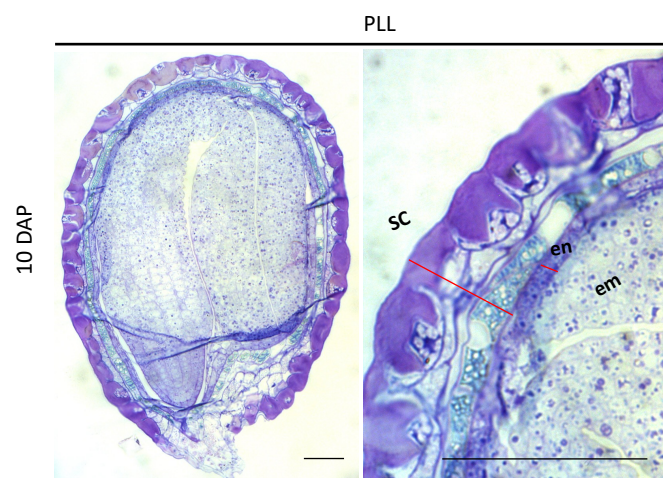

**Supplementary Figure 7. Semi-thin section of PLL seed at 10 DAP.** 10 DAP seeds collected from PLL plants were fixed and embedded for semi-thin section. SC, seed coat; en, endosperm; em, embryo; scale bars: 50  $\mu\text{m}$ .



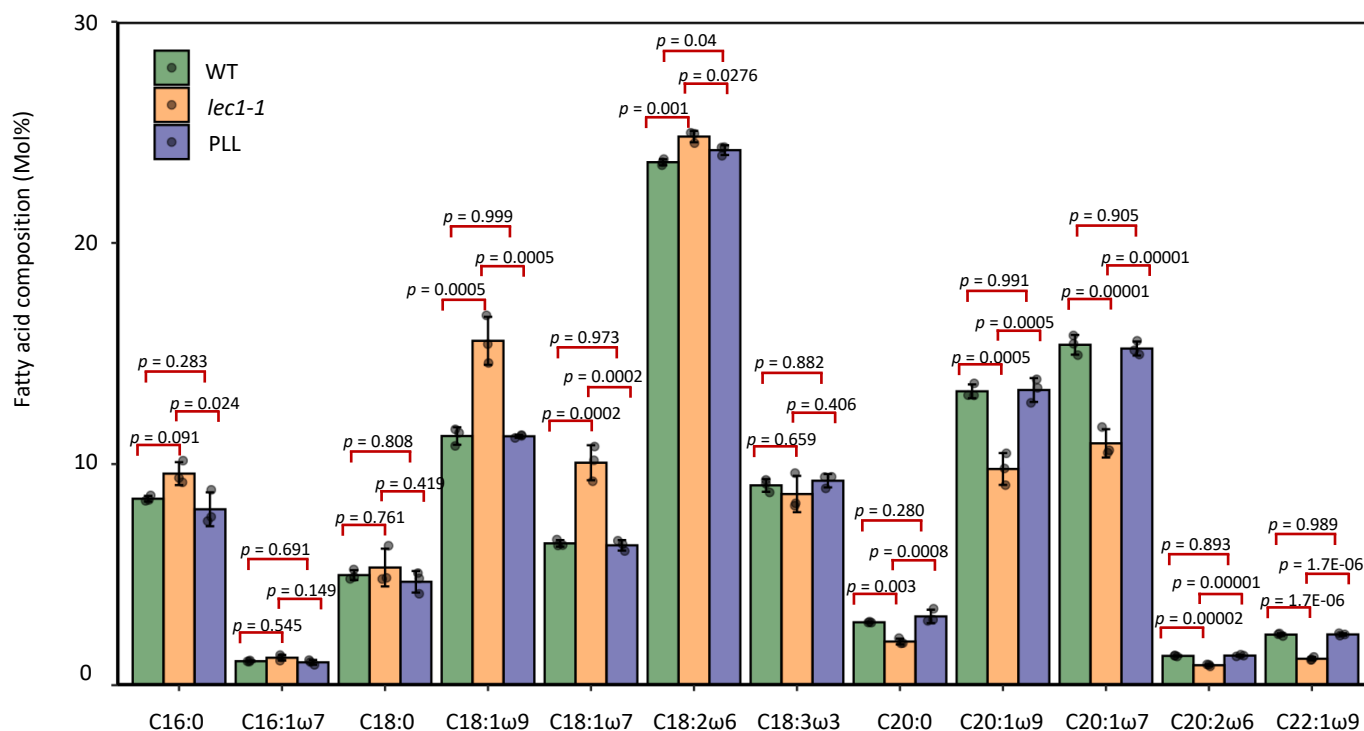

**Supplementary Figure 8. Fatty acid composition analysis of endosperm dissected from mature seeds.** Fatty acid composition profiles in endosperms isolated from WT, *lec1-1*, and PLL. Three independent replicates were conducted to calculate the means of values in each figure. Values are mean  $\pm$  standard error of three biological replicates. *p* values were determined with one-way ANOVA followed by the post-hoc Tukey multiple comparison tests. For each replicate, endosperm tissue dissected from 15 seeds were pooled together for GC analysis.

## Supplementary Figure 9

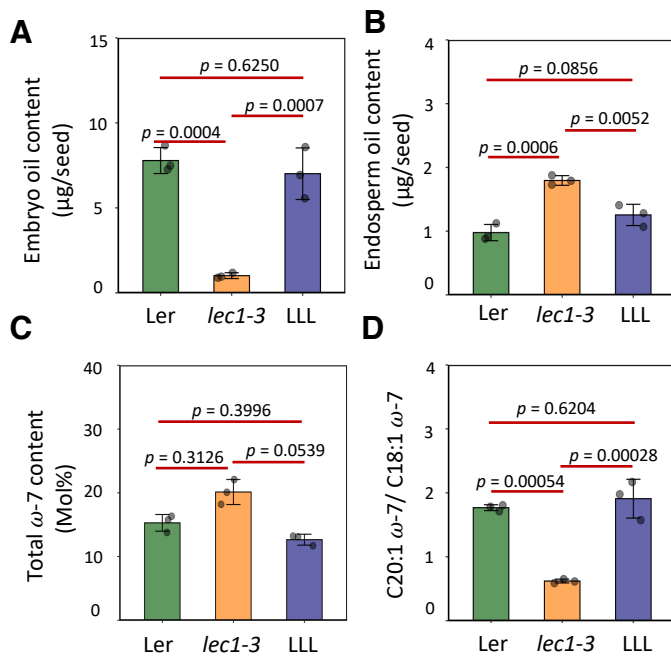

**Supplementary Figure 9. Lack of LEC1 alters endosperm fatty acid composition in Ler.** (A-D) Bargraphs showing the total oil content per seed in the embryo (A) and in the endosperm (B). (C) Total cis-ω-7 content accumulated in the endosperms of Ler (WT), *lec1-3*, and PLL seeds. (D) Statistic analysis of the ratios of C20:1 ω-7 versus C18:1 ω-7 in the endosperms of Ler, *lec1-3*, and LLL seeds. (A-D) Three independent replicates were conducted to calculate the means of values in each figure. For each replicate, 15 seeds of each genotype were dissected to separate embryo and endosperm tissues. Values are mean ± standard error of three biological replicates. *p* values were determined with one-way ANOVA followed by the post-hoc Tukey multiple comparison tests.

Supplementary Figure 10

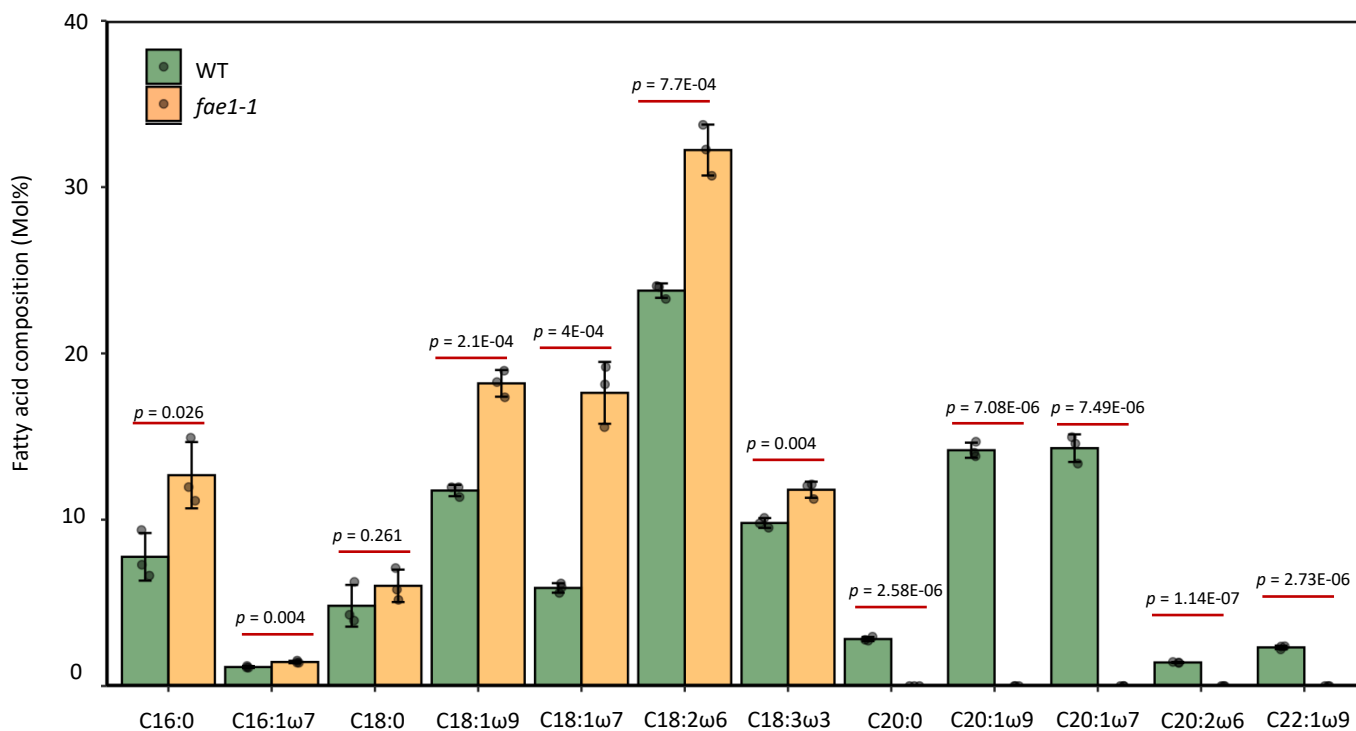

**Supplementary Figure 10. Fatty acid composition profiles of endosperm dissected from mature WT and *fae1-1* seeds.** Three independent replicates were conducted to calculate the means of values in each figure. Values are mean  $\pm$  standard error of three biological replicates. For each replicate, endosperm tissue dissected from 15 seeds were pooled together for GC analysis.  $p$  values were determined by conducting Student's t-test.

## Supplementary Figure 11

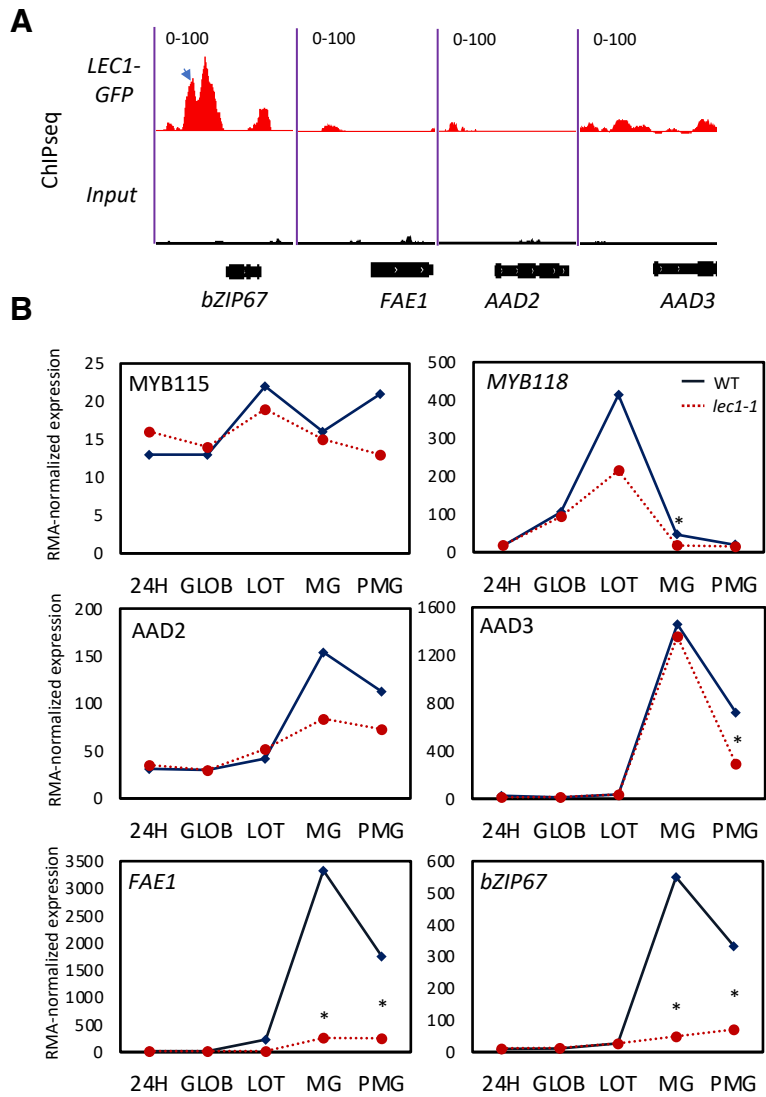

### Supplementary Figure 11. LEC1 regulates genes responsible for *cis*- $\omega$ -7 fatty acid accumulation and elongation.

(A) IGV views of ChIP-Seq signals indicate LEC1-occupied sites (pointed by arrowhead) on the promoter region of *bZIP67*, not on that of either *FAE1*, or *AAD2*, or *AAD3*. (B) Line graphs showing the transcription levels of *MYB115*, *MYB118*, *AAD2*, *AAD3*, *FAE1*, and *bZIP67* in WT and *lec1-1* seeds at different seed developmental stages (data collected from public resource). 24H, 24 hr after pollination; GLOB, globular stage; LOT, liner stage; MG, mature green; PMG, post mature green.

Supplementary Table 1. ChIP-Seq reads, mapping rates and peak calling information

| Sample name             | No. of sequenced reads | % of mapped reads | No. of called ChIP-seq peaks | ChIP-seq peaks present in both replicates and averaged ratio ( IDR < 0.05) |
|-------------------------|------------------------|-------------------|------------------------------|----------------------------------------------------------------------------|
| NP-PLL-PIM-GFP-ChIP R#1 | 33,715,832             | 88.06             | 14,806                       | 8,517                                                                      |
| NP-PLL-PIM-GFP-ChIP R#2 | 37,750,795             | 91.33             | 16,431                       |                                                                            |
| NP-PLL-PIM-input        | 28,905,178             | 96.74             | /                            |                                                                            |
| CE-PLL-ZIM-GFP-ChIP R#1 | 19,115,452             | 79.76             | 6,611                        | 1,721                                                                      |
| CE-PLL-ZIM-GFP-ChIP R#2 | 18,998,609             | 79.74             | 6,643                        |                                                                            |
| CE-PLL-ZIM-input        | 24,979,345             | 97.65             | /                            |                                                                            |
| DE-PLL-ZIM-GFP-ChIP R#1 | 36,528,043             | 88.12             | 7,118                        | 1,724                                                                      |
| DE-PLL-ZIM-GFP-ChIP R#2 | 29,412,997             | 83.15             | 4,112                        |                                                                            |
| DE-PLL-ZIM-input        | 34,291,183             | 98.01             | /                            |                                                                            |

Supplementary Table 2. RNA-Seq reads and mapping information

| Sample name          | Total reads | Uniquely mapped reads | Mapping ratio |
|----------------------|-------------|-----------------------|---------------|
| NP-WT-R#1            | 29036288    | 20394012              | 70.24%        |
| NP-WT-R#2            | 32215289    | 23066317              | 71.60%        |
| NP-WT-R#3            | 28918349    | 20756300              | 71.78%        |
| NP- <i>lec1</i> -R#1 | 33679743    | 24047481              | 71.40%        |
| NP- <i>lec1</i> -R#2 | 25888684    | 18764604              | 72.48%        |
| NP- <i>lec1</i> -R#3 | 27424942    | 19557993              | 71.31%        |
| CE-WT-R#1            | 24434385    | 18718255              | 76.61%        |
| CE-WT-R#2            | 26387863    | 20379305              | 77.23%        |
| CE-WT-R#3            | 22297316    | 18322235              | 74.10%        |
| CE- <i>lec1</i> -R#1 | 22235249    | 17138789              | 77.08%        |
| CE- <i>lec1</i> -R#2 | 23013113    | 17813006              | 77.40%        |
| CE- <i>lec1</i> -R#3 | 28961587    | 22424085              | 77.43%        |
| DE-WT-R#1            | 29856278    | 23206002              | 77.73%        |
| DE-WT-R#2            | 23832611    | 18569483              | 77.92%        |
| DE-WT-R#3            | 29368224    | 22808009              | 77.66%        |
| DE- <i>lec1</i> -R#1 | 24966484    | 19264921              | 77.16%        |
| DE- <i>lec1</i> -R#2 | 19839904    | 15119354              | 76.21%        |
| DE- <i>lec1</i> -R#3 | 26577683    | 20331626              | 76.50%        |

Supplementary Table 3. Primers used for this study

| Experiment                    | Primer ID            | Sequence                                                     |
|-------------------------------|----------------------|--------------------------------------------------------------|
| pPHE1::mCherry-NLS            | PAC1-pPHE1-F         | CTTAATTAAACTGTTGATCCGGTGAATATCC                              |
|                               | AVR1I-pPHE1-R        | TCACCTAGGATCTCTTATCTTTTCTTTGTGTATTTG                         |
|                               | Pac1-Avr1I-mcherry-F | CTTAATTAACTAGGATGGTGAGCAAGGGCGAGG                            |
|                               | Asc1-NLS-mcherry-R   | TGGCGCGCCTCAGTCCAACCTTGACCCTCTTGGCAGCAGGCTGTACAGCTCGTCCATGCC |
| INTACT component construction | Pme1-TurboID         | GGGTTTAAACTATGATCTCAAATACATTGATACATATC                       |
|                               | Asc1-TurBOID-Nos     | TTGGCGCGCCGAATTCTCATGTTTGACAGC                               |
|                               | Pac1-Avr1I-RAN-F     | CTTAATTAACTAGGATGGATCATTCAGCGAAAAC                           |
|                               | Spe1-NOS-R           | CCACTAGTGAATTCTCATGTTTGACAGC                                 |
|                               | Pac1-mCherry-F       | CTTAATTAAATGGTGAGCAAGGGCGAGG                                 |
|                               | Avr1I-mCherry-R      | TTCTAGGCTTGTACAGCTCGTCCATGCC                                 |
| promoter pPHE1 for PIM        | BP-pPHE1-F           | GGGGACAAGTTTGTACAAAAAGCAGGCTACTGTTGATCCGGTGAATATCC           |
|                               | BP-pPHE1-R           | GGGGACCACCTTTGTACAAGAAAGCTGGGTCATCTCTTATCTTTTCTTTGTGTATTTG   |
| promoter pZOU for ZIM         | BP-pZOU-F            | GGGGACAAGTTTGTACAAAAAGCAGGCTTACCACCCTATACTTATTAGACAG         |
|                               | BP-pZOU-R            | GGGGACCACCTTTGTACAAGAAAGCTGGGTCATTGAATTGAATGCTCATTTTACC      |
| ChIP-qPCR                     | FIE-CHIPqPCR-F       | TGATTGATACGATCGAAGTTT                                        |
|                               | FIE-CHIPqPCR-R       | ACGTGATACCATTTAAATCCA                                        |
|                               | YUC10-CHIPqPCR-F     | GTTTTGTCGGAATAAAACA                                          |
|                               | YUC10-CHIPqPCR-R     | TGAAAATGATCCATAGTTG                                          |
|                               | VIM1-CHIPqPCR-F      | ATTCGGGATTAATAATTGTTT                                        |
|                               | VIM1-CHIPqPCR-R      | TTGCAAATCGATATAAACCA                                         |
|                               | VIM2-CHIPqPCR-F      | ATTGCCGATTAATAACACG                                          |
|                               | VIM2-CHIPqPCR-R      | TTGCTACCAAAATTTCAATG                                         |
|                               | AGL61-CHIPqPCR-F     | TTTGATTTGCAACCTCTTTT                                         |
|                               | AGL61-CHIPqPCR-R     | GGTTTTGTCTTTAATTTTGTTG                                       |
|                               | BZIP62-CHIPqPCR-F    | GAGAGAGCGACACGTGTAAT                                         |
|                               | BZIP62-CHIPqPCR-R    | TGCTGACTTGGTAACAAAAA                                         |
| RT-qPCR                       | CACS-qF              | ACTCAGGAAGGTGTACGGTCA                                        |
|                               | CACS-qR              | TGCATTTGGAACAGGTTTGT                                         |
|                               | LEC1-qF              | CGATCGTGGTTCTGCACTTA                                         |
|                               | LEC1-qR              | ATTCATCTTGACCCGACGAC                                         |
